# Supplementary material for: Melatonin-mediated FKBP4 downregulation protects against stress-induced neuronal mitochondria dysfunctions by blocking nuclear translocation of GR
Source: PubMed Central journal article supplement (PMC9943853; doi:10.1038/s41419-023-05676-5), 2023-02-21

# Supplemental Material

Original WB

**Fig.1A**

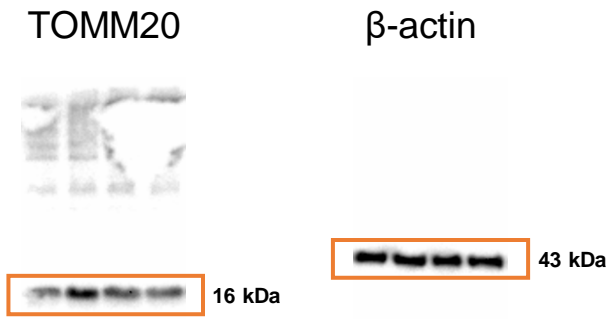

**Fig.1F**

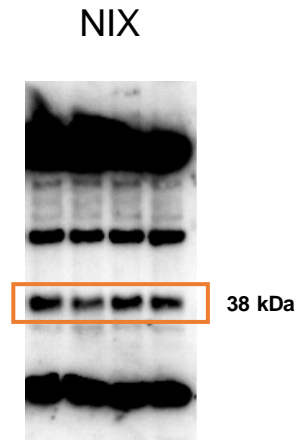

**Fig.1G**

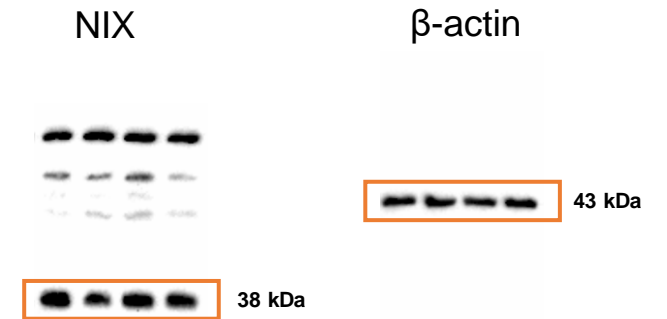

**Fig.2C**

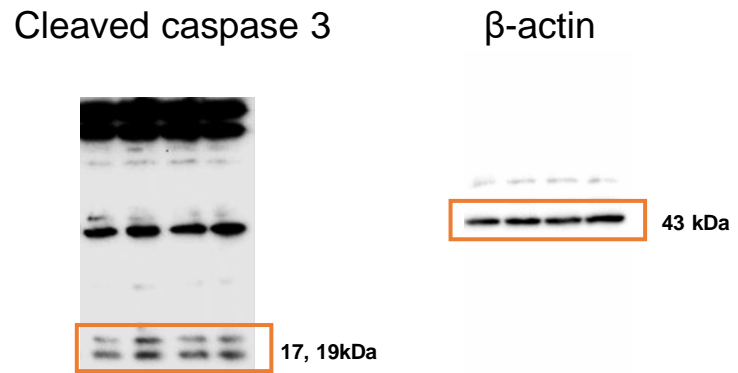

**Fig.2D**

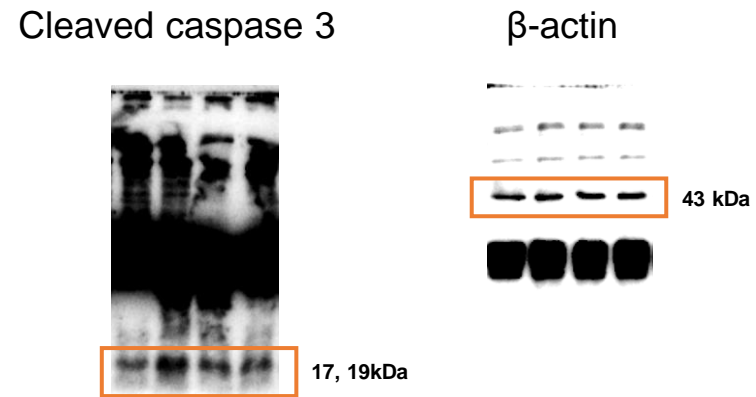

**Fig.3A**

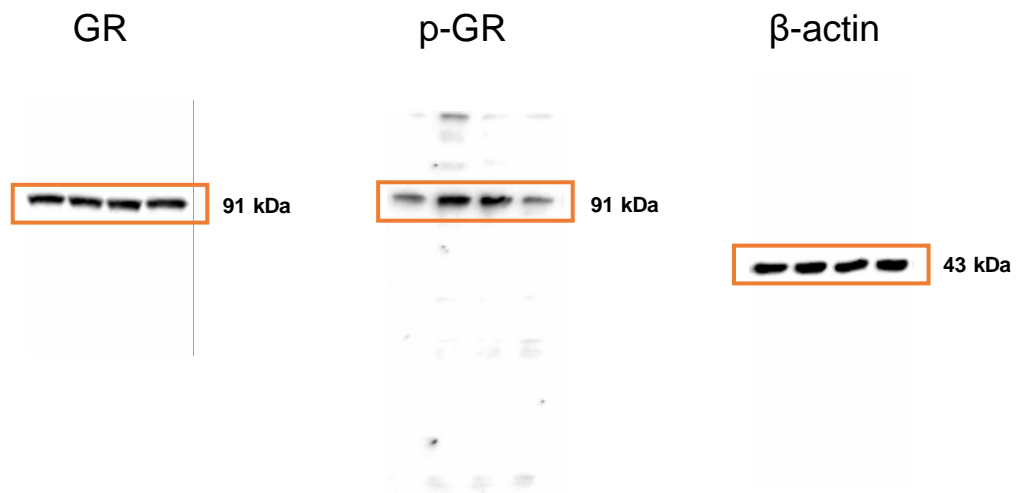

**Fig.3B**

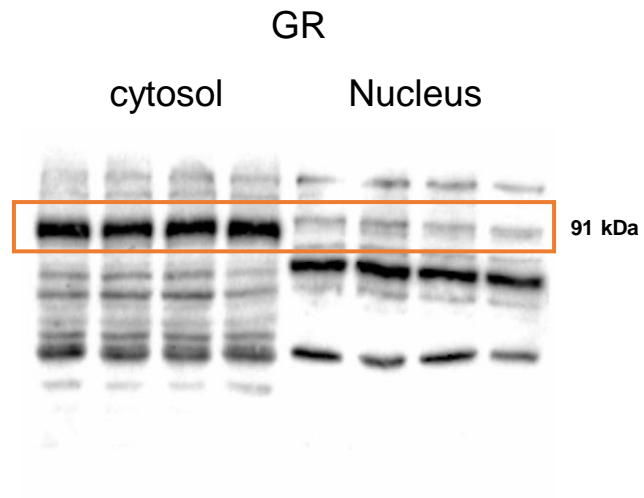

Lamin A/C

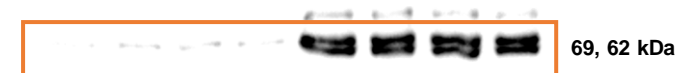

$\alpha$ -tubulin

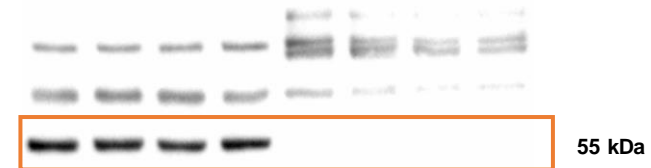

**Fig.3F**

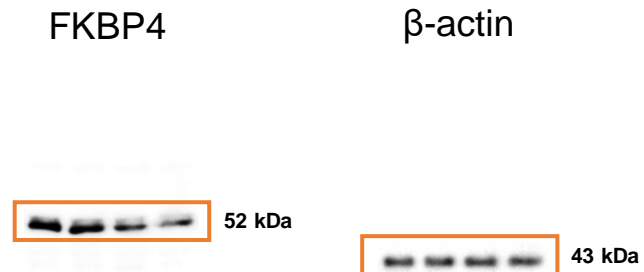

**Fig.3G**

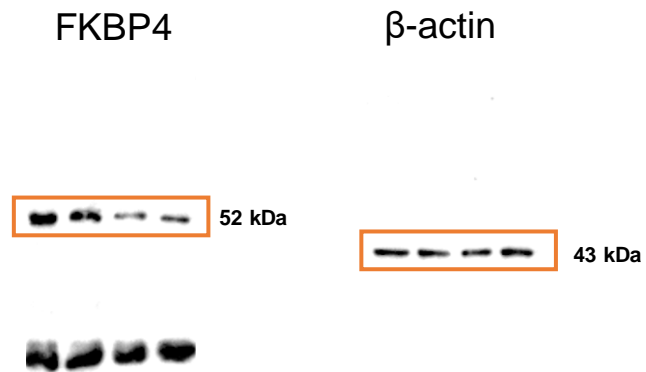

**Fig.4A**

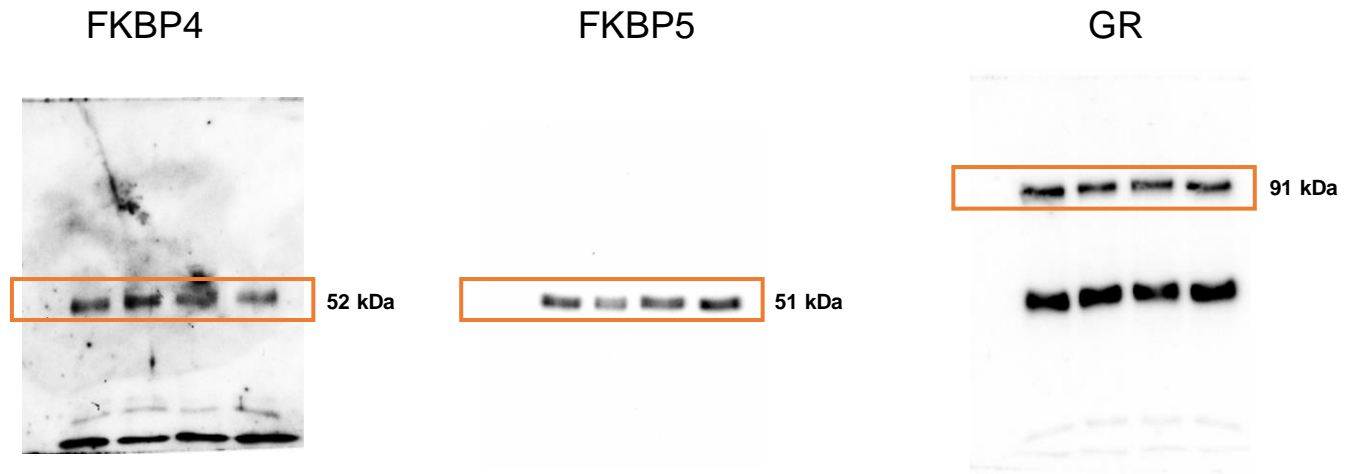

<Lysate>

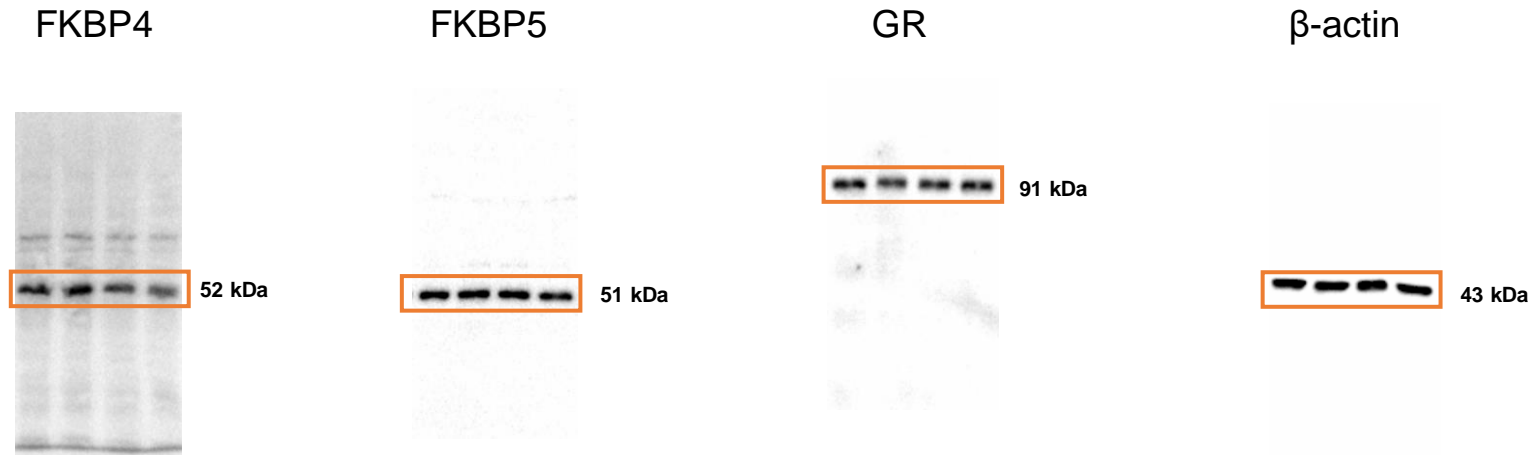

**Fig.5C**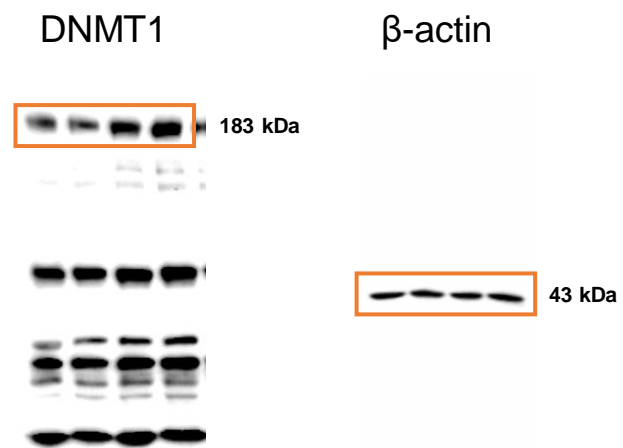**Fig.5D**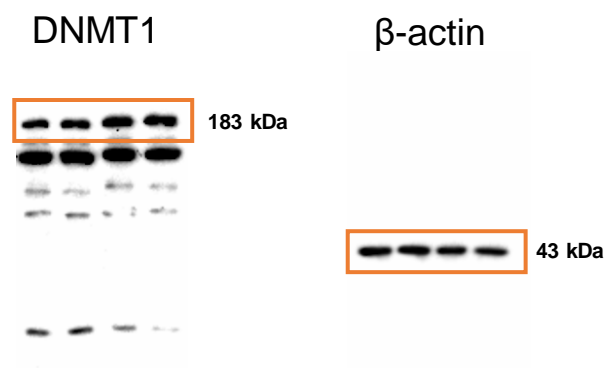**Fig.5F**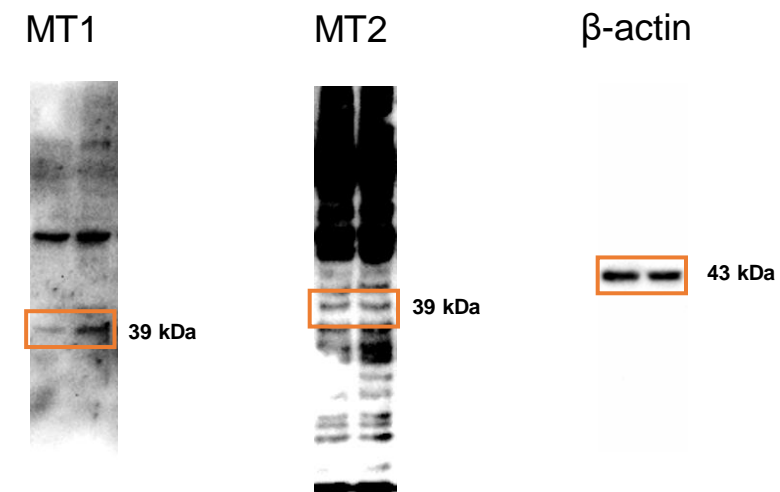**Fig.5G**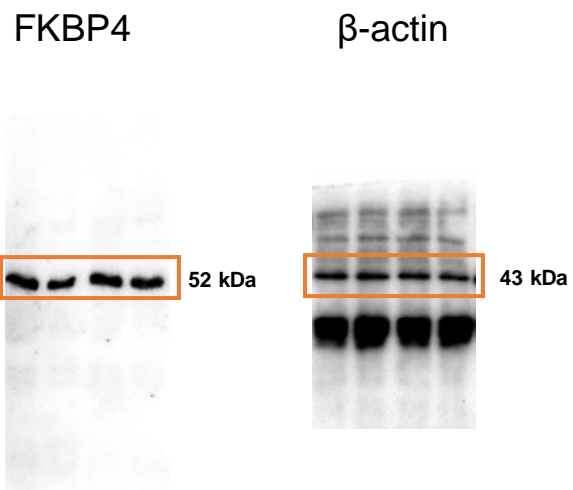**Fig.5I**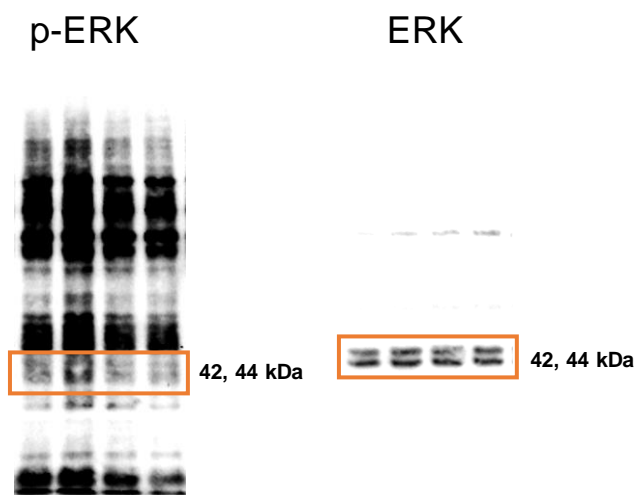**Fig.5J**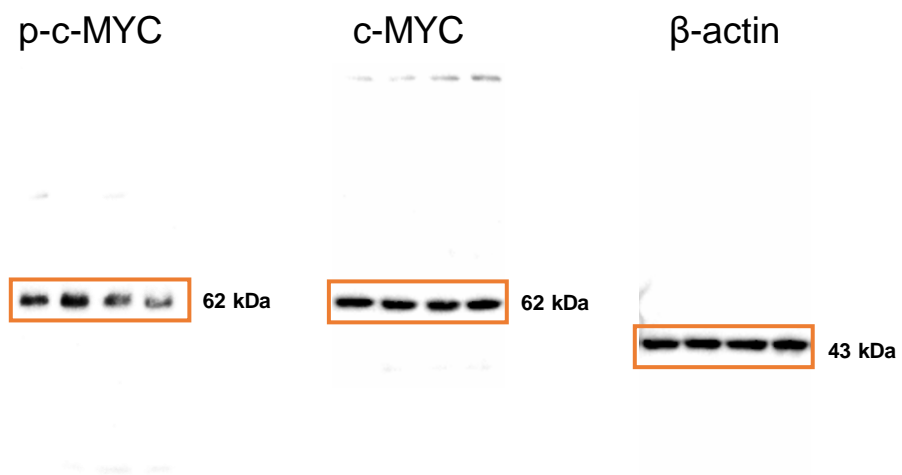

**Fig.6D**

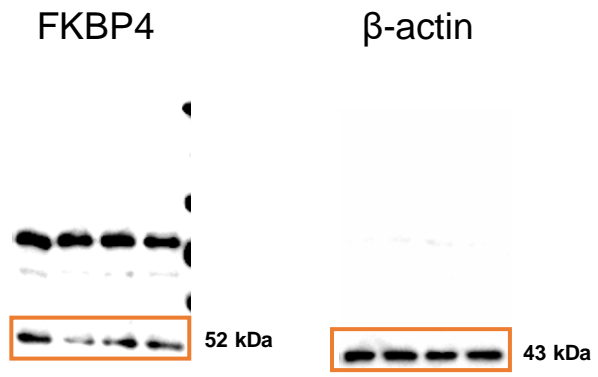

**Supplemental Fig S2.**

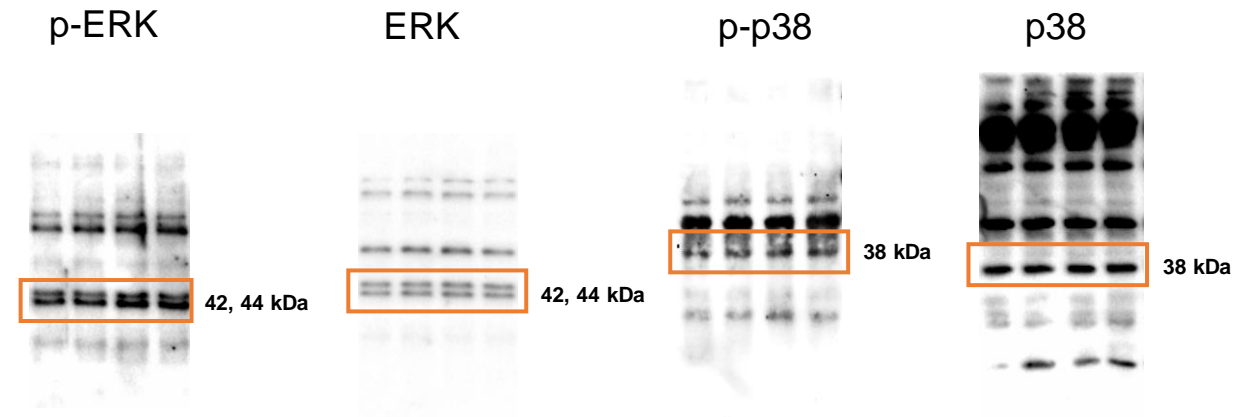

**Supplemental Fig S3.**

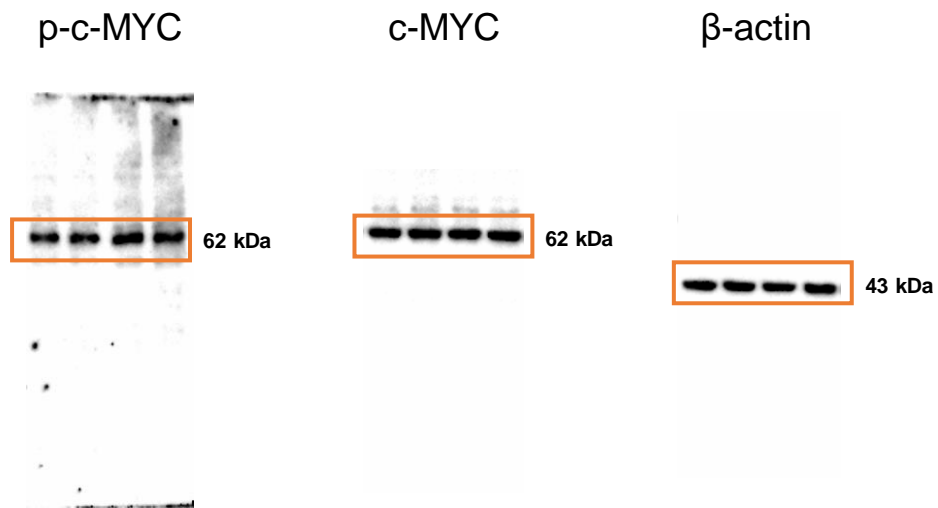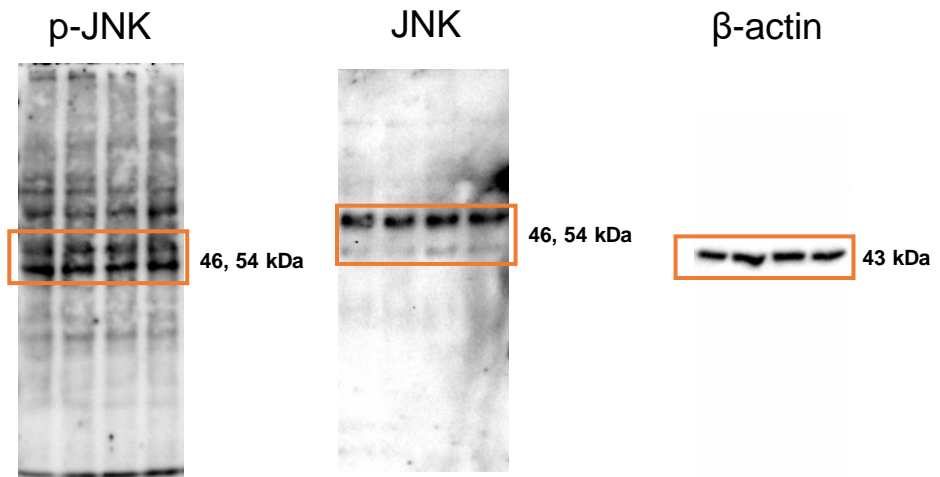

Supplement: 41419_2023_5676_MOESM3_ESM.pdf [file 41419_2023_5676_MOESM3_ESM.pdf]
